# Supplementary material
Source: publisher figshare collection journal article supplement (https://asha.figshare.com/articles/dataset/_/6030806)
Supplement: Supplementary file 1 [file 1]

## Supplemental Material S1. List of binomials.

|                               |                              |                         |                        |
|-------------------------------|------------------------------|-------------------------|------------------------|
| Above and beyond/below        | Flesh and bone               | Lunch and dinner        | Scratch and sniff      |
| Aches and pains               | Flotsam and jetsam           | Meat and potatoes/greet | Shock and awe          |
| Adult and child               | Frolic and play              | Mom and dad             | Show and tell          |
| Apples and oranges            | Give and take                | North and south         | Sick and tired         |
| Army and navy                 | Good and bad                 | Now and then/later      | Slice and dice         |
| Arrivals and departures       | Grunt and groan              | Null and void           | Soap and water         |
| Assault and battery           | Hamburgers and fries/hotdogs | Nuts and bolts          | Socks and shoes        |
| Back and forth                | Happy and sad                | Odds and ends/evens     | Song and dance         |
| Before and after              | Heart and soul               | On and off              | Soup and salad         |
| Bells and whistles            | Heaven and earth/hell        | One and two             | Spick and span         |
| Big and small/little          | Hello and goodbye            | Open and close/shut     | Spring and summer/fall |
| Bob and weave                 | Here and there/now           | Over and under/out      | Sunrise and sunset     |
| Boys and girls                | Hide and seek                | Part and parcel         | Supply and demand      |
| Bread and butter              | High and low                 | Past and present        | Surf and turf          |
| Breaking and entering         | Hill and dale                | Peanut butter and jelly | Sweet and sour         |
| Buy and sell                  | His and hers                 | Peace and quiet/war     | Thick and thin         |
| Call and response             | Hither and yon/thither       | Peas and carrots        | Thunder and lightening |
| Cat and mouse/dog             | Hook and ladder              | Pencil and paper        | Time and money/again   |
| Cease and desist              | Horse and buggy/carriage     | Pick and choose         | To and from            |
| Coming and going              | Huff and puff                | Prince and princess     | Top and bottom         |
| Cool and collected/hot        | Hugs and kisses              | Pros and cons           | Toss and turn          |
| Crash and burn                | Hungry and thirsty           | Pure and simple         | Trial and error        |
| Cup and saucer                | Hustle and bustle            | Push and pull/shove     | Tried and true         |
| Cute and cuddly               | In and out                   | Question and answer     | Twist and turn/shout   |
| Day and night                 | Intent and purposes          | Rant and rave           | War and peace          |
| Deposit and credit/withdrawal | Kit and caboodle             | Read and write          | Wax and wane           |
| Drawn and quartered           | Ladies and gentlemen         | Rest and relaxation     | Wear and tear          |
| Eat and drink                 | Lettuce and tomato           | Right and left/wrong    | Wine and cheese/dine   |
| Far and wide/near             | Light and dark               | Rock and roll           | Yes and no             |
| Fingers and toes              | Live and die                 | Rules and regulations   | You and me             |
| First and second/last         | Lock and key                 | Safe and sound          | Yours and mine         |
| Fish and chips/fowl           | Loud and clear/soft          | Said and done           |                        |
