# Supplementary material
Source: publisher figshare collection journal article supplement (https://asha.figshare.com/articles/dataset/_/6030806)
Supplement: Supplementary file 2 [file 1]

**Supplemental Material S2.** Sample coding of binomials.

| <b>Binomial</b>   | <b>Binomial<br/>freq</b> | <b>Response<br/>freq</b> | <b>Phon<br/>relation</b> | <b>Antony<br/>m</b> | <b>Gram<br/>category of<br/>response</b> | <b>N. of<br/>definitions of<br/>prompt</b> | <b>N. of<br/>plausible<br/>binomials</b> | <b>N. of response<br/>tokens</b> |
|-------------------|--------------------------|--------------------------|--------------------------|---------------------|------------------------------------------|--------------------------------------------|------------------------------------------|----------------------------------|
| soup and<br>salad | 1.36                     | 4.08                     | yes                      | no                  | noun                                     | 1                                          | 1                                        | 5                                |
| here and<br>now   | 2.93                     | 4.28                     | no                       | no                  | modifer                                  | 14                                         | 2                                        | 4                                |
